# Supplementary material for: Synthesis and photophysical properties of novel fluorescent materials containing 2,4,6-triphenylpyridine and 1,8-naphthalimide units using Suzuki reaction
Source: Royal Society of Chemistry journal article supplement (doi:10.1039/c6ra16408k), 2016-01-01
Supplement: c6ra16408k1.pdf [file c6ra16408k1.pdf]

# Electronic Supporting Information

## Synthesis and photophysical properties of novel fluorescent materials containing 2,4,6- triphenylpyridine and 1,8-naphthalimide units using suzuki reaction

Hui-Yan Liu, Liang-Feng Chen, Hai-Ying Wang\*, Yu Wan and Hui Wu\*

*School of Chemistry and Chemical Engineering, Jiangsu Normal University, Jiangsu Key  
Laboratory of Green Synthetic Chemistry for Functional Materials, Key Laboratory of  
Biotechnology on Medical Plant of Jiangsu Province, Xuzhou 221116, P. R. China*

E-mail: wanghy@jsnu.edu.cn; wuhui72@yahoo.com Tel: +86-516-83403165.

### Experimental Section

#### General information:

All solvents were carefully dried and freshly distilled according to common laboratory techniques. All reactants were commercially available and used without further purification. All reactions were monitored using thin layer chromatography (TLC) on pre-coated silica gel 60 F<sub>254</sub> (mesh); spots were observed under UV light. Melting points were recorded on electrothermal digital melting point apparatus and were uncorrected. Nuclear Magnetic Resonance (NMR) spectra was recorded at 295 K on a Bruker Avance DPX-400 MHz spectrometer using CDCl<sub>3</sub> as solvent and TMS as internal standard. UV-vis spectra were recorded on a Shimadzu UV-2501PC

spectrometer. Fluorescence spectra were obtained on a Hitachi FL-4500 spectrofluorometer. High resolution mass spectroscopy (HRMS) data were measured using micro TOF-Q(APCI) instrument. Cyclic voltammetry measurements were carried out under an inert nitrogen atmosphere with an Autolab potentiostat PGSTAT 10 using a three-electrode cell (platinum was used as the working electrode and as a counter electrode, and scanning calomel electrode as a reference electrode). The rate scan was 100 mV/s and the supporting electrolyte was a  $\text{Bu}_4\text{NPF}_6$  (0.1 mol/L) solution in  $\text{CH}_2\text{Cl}_2$ . TGA and DSC measurements were carried out on SDT 2960 and DSC 2010 instruments. The thermal analyses were carried out under a nitrogen flow and with a heating rate of 10 °C/min.

### Theory for calculation of dipole moment

The solute experiences an electric field due to induced polarization by the electric dipole moment of solute itself on solvent. It is proportional to dipole moment of solute in the ground and excited state, such relationships for the difference and sum of absorption,  $\bar{\nu}_a$ , and fluorescence,  $\bar{\nu}_f$ , maxima in  $\text{cm}^{-1}$  have been explained by Lippert's equations:

According to the Lippert's equation the difference of absorption,  $\bar{\nu}_a$ , and fluorescence,  $\bar{\nu}_f$ , maxima is given by

$$\bar{\nu}_a - \bar{\nu}_f = mf(\varepsilon, \eta) + \text{Constant} \quad (1)$$

Here, is Lippert's polarity function and is defined as:

$$f(\varepsilon, \eta) = \frac{\varepsilon - 1}{2\varepsilon + 1} - \frac{\eta^2 - 1}{2\eta^2 + 1} \quad (2)$$

and  $m$  is the slope of the graph obtained by plotting  $f(\varepsilon, \eta)$  versus Stokes shift ( $\bar{\nu}_a - \bar{\nu}_f$ ).

Similarly, difference of absorption,  $\bar{\nu}_a$ , and fluorescence,  $\bar{\nu}_f$ , maxima is given by Bakhshiev is as follows

$$\bar{\nu}_a - \bar{\nu}_f = m_1 f_1(\varepsilon, \eta) + \text{Constant} \quad (3)$$

Here,  $f_1(\varepsilon, \eta)$  is Bakhshiev's polarity function and  $m_1$  is the slope of the graph obtained by Plotting  $f_1(\varepsilon, \eta)$  versus Stokes shift ( $\bar{\nu}_a - \bar{\nu}_f$ ), which are expressed as follows:

$$f_1(\varepsilon, \eta) = \frac{2\eta^2 + 1}{\eta^2 + 2} \left[ \frac{\varepsilon - 1}{\varepsilon + 2} - \frac{\eta^2 - 1}{\eta^2 + 2} \right] \quad (4)$$

$$m_1 = \frac{2(\mu_e - \mu_g)^2}{hca_0^3} \quad (5)$$

Here,  $\mu_g$  and  $\mu_e$  are the dipole moments in ground state and excited state respectively,  $h$  is Planck's constant,  $c$  is the velocity of light in vacuum,  $\epsilon$  is the solvent dielectric constant and  $n$  is the solvent refractive index,  $a_0$  is the Onsager cavity radius.

Table S1 Optical properties of the compounds **8**

| Compounds | $\lambda_{\text{Abs.}}$ (nm)    |           | $\lambda_{\text{em}}$ (nm) |                                 | $\Phi^a$ |       |
|-----------|---------------------------------|-----------|----------------------------|---------------------------------|----------|-------|
|           | CH <sub>2</sub> Cl <sub>2</sub> | n-Heptane | Toluene                    | CH <sub>2</sub> Cl <sub>2</sub> |          | DMF   |
| <b>8a</b> | 358                             | 404       | 429                        | 433                             | 445      | 0.93  |
| <b>8b</b> | 358                             | 405       | 432                        | 434                             | 445      | 0.64  |
| <b>8c</b> | 356                             | 405       | 435                        | 437                             | 448      | 0.60  |
| <b>8d</b> | 357                             | 402       | 433                        | 435                             | 446      | 0.20  |
| <b>8e</b> | 357                             | 390       | 422                        | 441                             | 445      | 0.57  |
| <b>8f</b> | 356                             | 404       | 421                        | 439                             | 444      | 0.001 |
| <b>8g</b> | 358                             | 408       | 438                        | 439                             | 448      | 0.001 |

<sup>a</sup>The fluorescence quantum yields ( $\Phi$ ) were measured in CH<sub>2</sub>Cl<sub>2</sub> using quinine sulfate ( $\Phi = 0.55$ ) as standard.

Table S2. Values of solvent polarity functions using different correlation methods.

| Solvent   | $F(\epsilon, \eta)^1$ | $F_1(\epsilon, \eta)^2$ | $E_T^{N3}$ |
|-----------|-----------------------|-------------------------|------------|
| n-Heptane | 0.0007                | -0.00131                | 0.012      |
| Toluene   | 0.01323               | 0.02907                 | 0.099      |
| DCM       | 0.21713               | 0.59033                 | 0.321      |
| DMF       | 0.27438               | 0.83556                 | 0.386      |

<sup>1</sup> Lippert–Mataga bulk solvent polarity function.

<sup>2</sup> Bakhshiev bulk solvent polarity function.

<sup>3</sup> Reichardt microscopic solvent polarity function.

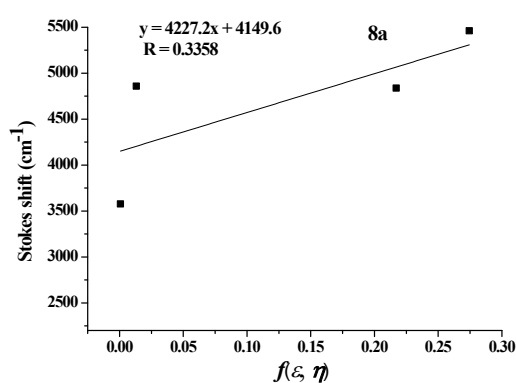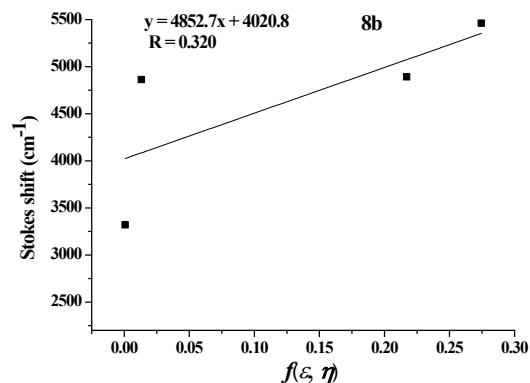

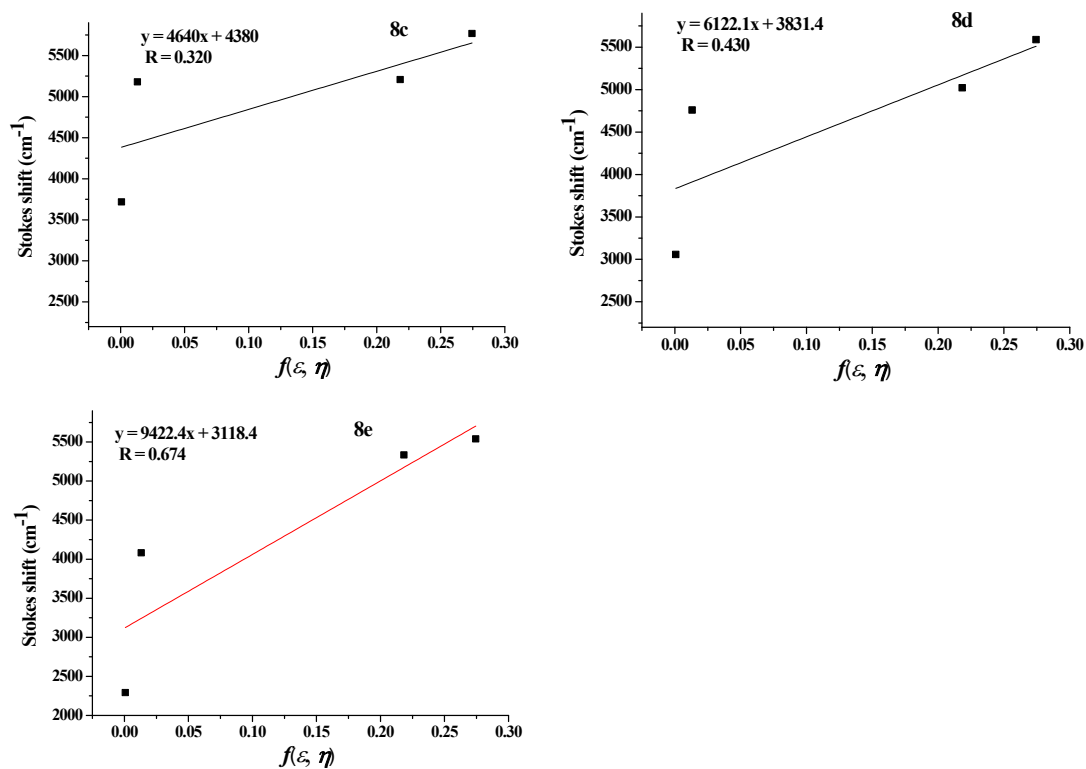

**Figure S1.** Plot of Stokes shift ( $\Delta\nu$ ) with Lippert's polarity parameter  $f(\epsilon, \eta)$  for compounds **8a-e**.

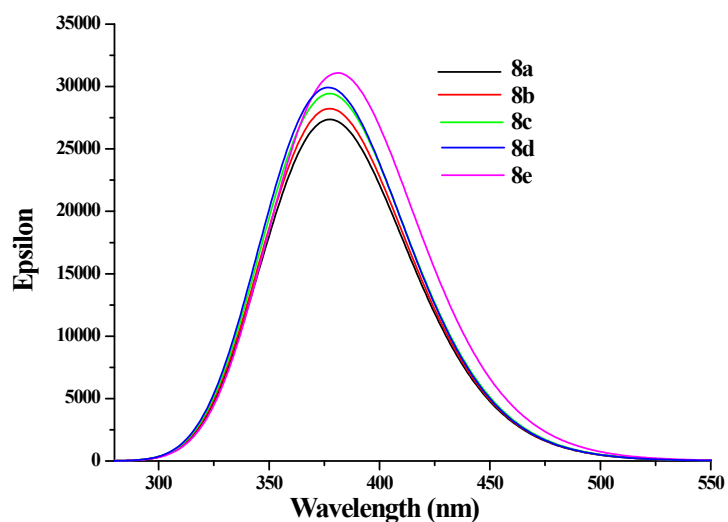

**Figure S2.** Absorption spectra of **8a-e** in  $\text{CH}_2\text{Cl}_2$  by theoretical studies using the TDDFT method in the Gaussian 09 W software programme.

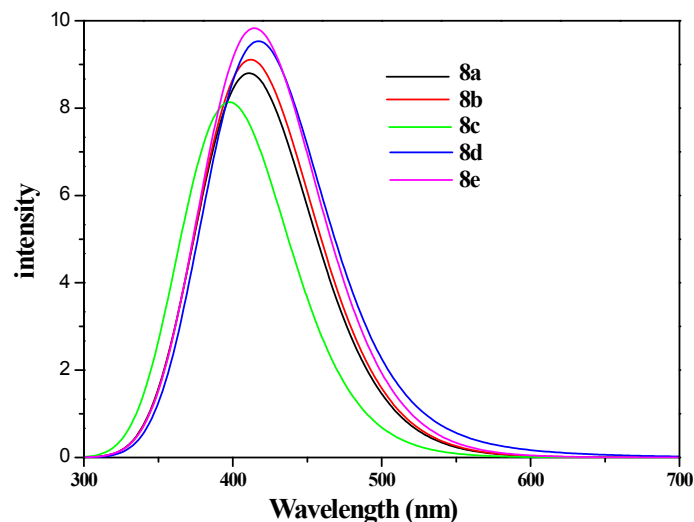

**Figure S3.** Emission spectra of **8a-e** in  $\text{CH}_2\text{Cl}_2$  by theoretical studies using the TDDFT method in the Gaussian 09 W software programme.

#### The procedure for the synthesis of compounds **3**

Compound **3** were synthesized according to literature method.<sup>7</sup> A solution of 4-bromobenzaldehyde (10.0 mmol), phenyl methyl ketone (20.0 mmol), ammonium acetate (100 mmol) in ethanol (150 mL) was refluxed at 80 °C for 24 h. After the finish, filtered the mixture and recrystallized the precipitate with ethanol to give the pure compound **3**.

*4-(4-bromophenyl)-2,6-diphenylpyridine (3)*: Yield 30%, white powder,  $^1\text{H}$  NMR (400 MHz,  $\text{CDCl}_3$ )  $\delta$  8.19 (d,  $J = 7.1$  Hz, 4H), 7.84 (s, 2H), 7.64 (q,  $J = 8.6$  Hz, 4H), 7.52 (t,  $J = 7.4$  Hz, 4H), 7.46 (t,  $J = 6.7$  Hz, 2H).

#### The procedure for the preparation of compound **4**

Compound **3** (5 mmol), bis(pinacolato)diboron (5 mmol), cesiumcarbonate (7.5 mmol),  $\text{Pd}(\text{PPh}_3)_4$  (0.2 mmol) and dioxane (25 mL) were added into a 50 mL branch-pipe round bottom flask. The mixture was degassed by gently bubbling nitrogen for 30 min and then heated in an oil bath at 85 °C until completion (72 h). After cooling, the product was extracted with DCM, washed with water, dried over  $\text{Na}_2\text{SO}_4$ , filtered, concentrated and further purified by column chromatography (silica gel, hexane/ethyl acetate, 50/1, v/v) to afford compound **4**.

*2,6-diphenyl-4-(4-(4,4,5,5-tetramethyl-1,3,2-dioxaborolan-2-yl)phenyl)pyridine (4)*: Yield

75%, white powder, Mp: 165-168 °C, <sup>1</sup>H NMR (400 MHz, CDCl<sub>3</sub>) δ 8.20 (d, *J* = 7.6 Hz, 4H), 7.98 (d, *J* = 7.6 Hz, 2H), 7.92 (s, 2H), 7.77 (d, *J* = 7.6 Hz, 2H), 7.53 (t, *J* = 7.4 Hz, 4H), 7.46 (t, *J* = 7.1 Hz, 2H), 1.39 (s, 12H). <sup>13</sup>C NMR (100 MHz, CDCl<sub>3</sub>) δ 157.4, 135.6, 129.3, 128.7, 127.4, 126.5, 117.6, 84.0, 24.9. HRMS (APCI) *m/z*: calcd for C<sub>29</sub>H<sub>29</sub>BNO<sub>2</sub>, (M+H)<sup>+</sup>: 434.2291, Found: 434.2351.

### General procedure for the synthesis of compounds 7

Compounds 7 were synthesized according to literature method.<sup>4h</sup> A solution of 4-bromo-1,8-naphthalic anhydride 5 (5 mmol), alkyl amine 6 (or aromatic amine) (6 mmol) in acetic acid (30 mL) was refluxed at 95 °C for 24 h. After the finish, filtered the mixture and recrystallized the precipitate with ethanol (or acetic acid) to give the pure compounds 7.

*6-Bromo-2-methyl-1H-benzo[de]isoquinoline-1,3(2H)-dione (7a)*: Yield 70%, yellow powder, <sup>1</sup>H NMR (400 MHz, CDCl<sub>3</sub>): δ 8.67 (d, *J* = 7.2 Hz, 1H), 8.57 (d, *J* = 8.5 Hz, 1H), 8.42 (d, *J* = 7.8 Hz, 1H), 8.05 (d, *J* = 7.7 Hz, 1H), 7.85 (t, *J* = 7.9 Hz, 1H), 3.56 (s, 3H).

*6-Bromo-2-butyl-1H-benzo[de]isoquinoline-1,3(2H)-dione (7b)*: Yield 72%, yellow powder, <sup>1</sup>H NMR (400 MHz, CDCl<sub>3</sub>): δ 8.66 (d, *J* = 7.2 Hz, 1H), 8.57 (d, *J* = 8.4 Hz, 1H), 8.42 (d, *J* = 7.7 Hz, 1H), 8.04 (d, *J* = 7.9 Hz, 1H), 7.85 (t, *J* = 7.8 Hz, 1H), 4.18 (t, *J* = 7.4 Hz, 2H), 1.74 ~ 1.65 (m, 2H), 1.45 (dd, *J* = 14.8, 7.4 Hz, 2H), 0.98 (t, *J* = 7.3 Hz, 3H).

*6-Bromo-2-phenyl-1H-benzo[de]isoquinoline-1,3(2H)-dione (7c)*: Yield 69%, yellow powder, <sup>1</sup>H NMR (400 MHz, CDCl<sub>3</sub>): δ 8.71 (d, *J* = 7.3 Hz, 1H), 8.64 (d, *J* = 8.5 Hz, 1H), 8.47 (d, *J* = 7.9 Hz, 1H), 8.09 (d, *J* = 7.8 Hz, 1H), 7.90 (t, *J* = 7.9 Hz, 1H), 7.57 (t, *J* = 7.5 Hz, 2H), 7.50 (t, *J* = 7.4 Hz, 1H), 7.32 (d, *J* = 7.8 Hz, 2H).

*6-Bromo-2-p-tolyl-1H-benzo[de]isoquinoline-1,3(2H)-dione (7d)*: Yield 70%, yellow powder, <sup>1</sup>H NMR (400 MHz, CDCl<sub>3</sub>): δ 8.71 (d, *J* = 7.3 Hz, 1H), 8.63 (d, *J* = 8.5 Hz, 1H), 8.46 (d, *J* = 7.7 Hz, 1H), 8.08 (d, *J* = 7.7 Hz, 1H), 7.89 (t, *J* = 7.8 Hz, 1H), 7.36 (t, *J* = 7.6 Hz, 2H), 7.20 (d, *J* = 7.4 Hz, 2H), 2.45 (s, 3H).

*6-Bromo-2-(naphthalen-1-yl)-1H-benzo[de]isoquinoline-1,3(2H)-dione (7e)*: Yield 65%, yellow powder, <sup>1</sup>H NMR (400 MHz, CDCl<sub>3</sub>) δ 8.74 (d, *J* = 7.3 Hz, 1H), 8.69 (d, *J* = 8.5 Hz, 1H), 8.49 (d, *J* = 7.8 Hz, 1H), 8.12 (d, *J* = 7.8 Hz, 1H), 8.01 (d, *J* = 8.3 Hz, 1H), 7.98 - 7.89 (m, 2H), 7.63 (m, 2H), 7.51 (t, *J* = 8.6 Hz, 2H), 7.47 - 7.40 (m, 1H).

*6-bromo-2-(naphthalen-2-yl)-1H-benzo[de]isoquinoline-1,3(2H)-dione (7f)*: Yield 65%,

yellow powder,  $^1\text{H}$  NMR (400 MHz,  $\text{CDCl}_3$ )  $\delta$  8.73 (d,  $J = 8.2$  Hz, 1H), 8.66 (d,  $J = 8.5$  Hz, 1H), 8.49 (d,  $J = 7.9$  Hz, 1H), 8.10 (d,  $J = 7.9$  Hz, 1H), 8.02 (d,  $J = 8.6$  Hz, 1H), 7.95 - 7.84 (m, 4H), 7.54 (m, 2H), 7.39 (m, 1H).

*Methyl 4-(6-bromo-1,3-dioxo-1H-benzo[de]isoquinolin-2(3H)-yl)benzoate (7g)*: Yield 65%, yellow powder,  $^1\text{H}$  NMR (400 MHz,  $\text{CDCl}_3$ )  $\delta$  8.71 (d,  $J = 7.3$  Hz, 1H), 8.66 (d,  $J = 8.5$  Hz, 1H), 8.46 (d,  $J = 7.9$  Hz, 1H), 8.23 (d,  $J = 8.4$  Hz, 2H), 8.10 (d,  $J = 7.9$  Hz, 1H), 7.91 (t,  $J = 7.9$  Hz, 1H), 7.41 (d,  $J = 8.4$  Hz, 2H), 3.97 (s, 3H).

### General procedure for the synthesis of compounds 8

Compounds **7a-g** (1 mmol), **4** (1.2 mmol), Cesiumcarbonate (1.5 mmol),  $\text{Pd}(\text{PPh}_3)_4$  catalyst (0.04 mmol) and dioxane (5 mL) were added into a 50 mL branch-pipe round bottom flask. The mixture was degassed by gently bubbling nitrogen for 30 min and then heated in an oil bath at 85 °C until completion (72 h). After cooling, the product was extracted with  $\text{CH}_2\text{Cl}_2$ , washed with water, dried over  $\text{Na}_2\text{SO}_4$ , filtered, concentrated and further purified by recrystallizing from dichloromethane and ethanol to obtain compounds **8a-g**. The seven starburst compounds synthesized are easily soluble in common organic solvents such as chloroform, toluene, ethyl acetate and DMF.

*6-(4-(2,6-Diphenylpyridin-4-yl)phenyl)-2-methyl-1H-benzo[de]isoquinoline-1,3(2H)-dione (8a)*: Yield 65%, yellow powder,  $^1\text{H}$  NMR (400 MHz,  $\text{CDCl}_3$ )  $\delta$  8.69 (t,  $J = 8.3$  Hz, 2H), 8.34 (d,  $J = 8.5$  Hz, 1H), 8.25 (d,  $J = 7.7$  Hz, 4H), 8.00 (s, 2H), 7.96 (d,  $J = 7.8$  Hz, 2H), 7.76 (m, 2H), 7.70 (d,  $J = 7.8$  Hz, 2H), 7.56 (t,  $J = 7.5$  Hz, 4H), 7.49 (t,  $J = 7.1$  Hz, 2H), 3.62 (s, 3H).  $^{13}\text{C}$  NMR (100 MHz,  $\text{CDCl}_3$ )  $\delta$  164.5, 164.3, 157.7, 149.4, 146.0, 139.5, 139.2, 132.5, 131.3, 130.8, 130.0, 129.3, 128.7, 127.9, 127.5, 127.1, 122.8, 121.9, 117.1, 27.1. HRMS (APCI)  $m/z$ : calcd for  $\text{C}_{36}\text{H}_{25}\text{N}_2\text{O}_2$   $[\text{M}+\text{H}]^+$ : 517.1916, Found: 517.1916.

*2-Butyl-6-(4-(2,6-diphenylpyridin-4-yl)phenyl)-1H-benzo[de]isoquinoline-1,3(2H)-dione (8b)*: Yield 63%, yellow powder,  $^1\text{H}$  NMR (400 MHz,  $\text{CDCl}_3$ )  $\delta$  8.69 (t,  $J = 8.1$  Hz, 2H), 8.33 (d,  $J = 8.3$  Hz, 1H), 8.24 (d,  $J = 7.4$  Hz, 4H), 8.04-7.94 (m, 4H), 7.80-7.70 (m, 4H), 7.60-7.50 (m, 6H), 4.26-4.20 (m, 2H), 1.76 (t,  $J = 6.5$  Hz, 2H), 1.51-1.46 (m, 2H), 1.00 (t,  $J = 7.3$  Hz, 3H).  $^{13}\text{C}$  NMR (100 MHz,  $\text{CDCl}_3$ )  $\delta$  164.1, 157.4, 139.9, 132.3, 131.3, 130.8, 129.9, 129.6, 128.8, 127.9, 127.5, 127.1, 123.0, 117.70, 40.3, 30.2, 20.4, 13.8. HRMS (APCI)  $m/z$ : calcd for  $\text{C}_{39}\text{H}_{31}\text{N}_2\text{O}_2$   $[\text{M}+\text{H}]^+$ : 559.2386, Found: 559.2350.

*6-(4-(2,6-Diphenylpyridin-4-yl)phenyl)-2-phenyl-1H-benzo[de]isoquinoline-1,3(2H)-dione* (**8c**): Yield 60%, yellow powder, <sup>1</sup>H NMR (400 MHz, CDCl<sub>3</sub>) δ 8.74 (t, *J* = 8.0 Hz, 2H), 8.39 (d, *J* = 7.8 Hz, 1H), 8.24 (d, *J* = 7.5 Hz, 4H), 8.05-7.97 (m, 4H), 7.84-7.73 (m, 4H), 7.57 (m, 9H), 7.37 (d, *J* = 7.6 Hz, 2H). <sup>13</sup>C NMR (100 MHz, CDCl<sub>3</sub>) δ 164.4, 164.2, 157.6, 146.3, 139.5, 139.1, 135.3, 132.7, 131.7, 131.2, 130.7, 130.1, 129.4, 129.1, 128.7, 128.0, 127.6, 127.2, 123.1, 122.2, 117.2. HRMS (APCI) *m/z*: calcd for C<sub>41</sub>H<sub>27</sub>N<sub>2</sub>O<sub>2</sub> [M+H]<sup>+</sup>: 579.2073, Found: 579.2071.

*6-(4-(2,6-Diphenylpyridin-4-yl)phenyl)-2-ptolyl-1H-benzo[de]isoquinoline-1,3(2H)-dione* (**8d**): Yield 60%, yellow powder, <sup>1</sup>H NMR (400 MHz, CDCl<sub>3</sub>) δ 8.72 (t, *J* = 8.2 Hz, 2H), 8.38 (d, *J* = 9.1 Hz, 1H), 8.25 (d, *J* = 6.8 Hz, 4H), 8.07-7.94 (m, 4H), 7.83-7.71 (m, 4H), 7.53 (m, 6H), 7.38 (d, *J* = 7.2 Hz, 2H), 7.23 (s, 2H), 2.46 (s, 3H). <sup>13</sup>C NMR (100 MHz, CDCl<sub>3</sub>) δ 164.5, 164.3, 157.4, 146.1, 138.7, 132.6, 131.7, 131.2, 130.8, 130.1, 129.7, 129.4, 128.8, 128.2, 128.2, 127.5, 127.1, 123.2, 117.7, 21.3. HRMS (APCI) *m/z*: calcd for C<sub>42</sub>H<sub>29</sub>N<sub>2</sub>O<sub>2</sub> [M+H]<sup>+</sup>: 593.2229, Found: 593.2214.

*6-(4-(2,6-Diphenylpyridin-4-yl)phenyl)-2-(naphthalen-1-yl)-1H-benzo[de]isoquinoline-1,3(2H)-dione* (**8e**): Yield 60%, yellow powder, <sup>1</sup>H NMR (400 MHz, CDCl<sub>3</sub>) δ 8.76 (t, *J* = 8.3 Hz, 2H), 8.43 (d, *J* = 7.7 Hz, 1H), 8.24 (d, *J* = 6.7 Hz, 4H), 8.09 - 7.96 (m, 6H), 7.82 (m, 4H), 7.68 (d, *J* = 7.5 Hz, 2H), 7.56 (m, 8H), 7.46 (t, *J* = 7.0 Hz, 1H). <sup>13</sup>C NMR (100 MHz, CDCl<sub>3</sub>) δ 164.4, 157.5, 146.4, 139.7, 138.8, 134.5, 132.9, 132.2, 131.9, 131.4, 130.8, 130.2, 129.4, 128.8, 128.0, 127.7, 127.6, 127.1, 126.7, 125.6, 122.2, 121.8, 117.5. HRMS (APCI) *m/z*: calcd for C<sub>45</sub>H<sub>29</sub>N<sub>2</sub>O<sub>2</sub> [M+H]<sup>+</sup>: 629.2229, Found: 629.2220.

*6-(4-(2,6-Diphenylpyridin-4-yl)phenyl)-2-(naphthalen-2-yl)-1H-benzo[de]isoquinoline-1,3(2H)-dione* (**8f**): Yield 65%, yellow powder, <sup>1</sup>H NMR (400 MHz, CDCl<sub>3</sub>) δ 8.78 (t, *J* = 8.1 Hz, 2H), 8.44 (d, *J* = 8.3 Hz, 1H), 8.28 (d, *J* = 7.3 Hz, 4H), 8.08 - 7.90 (m, 8H), 7.84 (m, 2H), 7.76 (d, *J* = 7.9 Hz, 2H), 7.61 - 7.45 (m, 9H). <sup>13</sup>C NMR (100 MHz, CDCl<sub>3</sub>) δ 164.5, 164.3, 157.7, 149.3, 146.4, 139.4, 133.6, 133.2, 132.8, 131.7, 131.2, 130.7, 130.2, 129.2, 128.7, 128.2, 127.8, 127.2, 126.7, 126.4, 126.1, 123.2, 122.1, 117.0. HRMS (APCI) *m/z*: calcd for C<sub>45</sub>H<sub>29</sub>N<sub>2</sub>O<sub>2</sub> [M+H]<sup>+</sup>: 629.2229, Found: 629.2220.

*Methyl-4-(6-(4-(2,6-diphenylpyridin-4-yl)phenyl)-1,3-dioxo-1H-benzo[de]isoquinolin-2(3H)-yl)benzoate* (**8g**): Yield 65%, yellow powder, <sup>1</sup>H NMR (400 MHz, CDCl<sub>3</sub>) δ 8.73 (t,



$J = 8.1$  Hz, 2H), 8.42 (d,  $J = 8.5$  Hz, 1H), 8.26 (d,  $J = 7.9$  Hz, 5H), 8.02 - 7.94 (m, 4H), 7.81 (m, 2H), 7.69 (m, 3H), 7.55 (t,  $J = 7.3$  Hz, 4H), 7.47 (m, 4H), 3.97 (s, 3H).  $^{13}\text{C}$  NMR (100 MHz,  $\text{CDCl}_3$ )  $\delta$  164.1, 157.7, 139.5, 139.2, 133.0, 131.8, 131.3, 130.7, 129.5, 128.7, 128.0, 127.6, 127.2, 117.1, 52.3. HRMS (APCI)  $m/z$ : calcd for  $\text{C}_{43}\text{H}_{29}\text{N}_2\text{O}_4$   $[\text{M}+\text{H}]^+$ : 637.2127 Found: 637.2290.

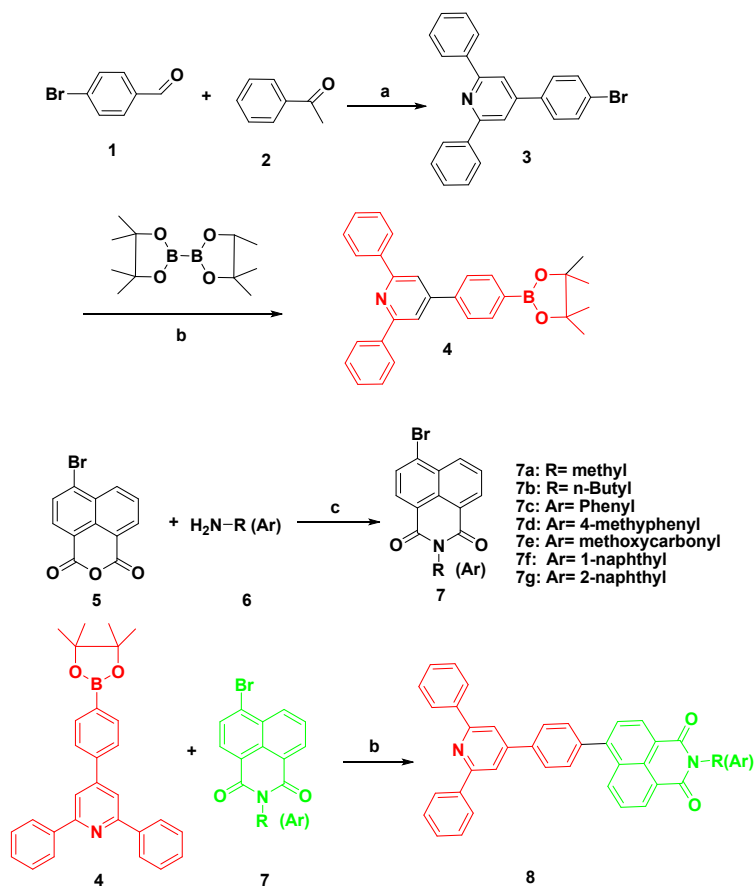

**Scheme 1** Synthetic routines for compound **3**, **4**, **7** and **8**. *Reagents and conditions:* (a)  $\text{NH}_4\text{OAc}$ ,  $\text{EtOH}$ ,  $80\text{ }^\circ\text{C}$ ; (b) cat.  $\text{Pd}(\text{PPh}_3)_4$ ,  $\text{Cs}_2\text{CO}_3$ , dioxane,  $80\text{ }^\circ\text{C}$ ; (c) acetic acid,  $95\text{ }^\circ\text{C}$ .
